# Supplementary material
Source: publisher figshare collection journal article supplement (https://sage.figshare.com/ndownloader/files/15681110)
Supplement: Supplementary file 1 [file 15681110]

Supplementary Table 1

*Untransformed values of the separate policies.*

| Countries | GBD coverage | Number of CAMHS per 100000 young people | Number of CAMH psychiatrists per 100000 young people | Number of CAMH psychologists per 100000 young people | OECD % of GDP spent on family benefits in 2013, 2012, or 2011 | % of GDP spent on education in 2011/2010 |
| --- | --- | --- | --- | --- | --- | --- |
| Austria | 0 | 0.7 | 6.0 | - | 2.61 | 5.8 |
| Belgium | 1 | 2.4 | 11.1 | - | 3.33 | 6.55 |
| Bulgaria | 0 | 0.5 | 1.9 | 1.7 | 1.45* | 3.82 |
| Croatia | 0 | 1.3 | 6.3 | 3.1 | 0.96* | 4.21 |
| Czech Republic | 0 | 0.8 | 6.8 | 4.4 | 3.14 | 4.51 |
| Denmark | 1 | 1.1 | 10.3 | 22.4 | 3.66 | 8.75 |
| Estonia | 1 | 2.1 | 16.8 | 25.2 | 2.13 | 5.16 |
| Finland | 6 | 12.9 | 36.0 | 36.9 | 3.21 | 6.76 |
| France | 5 | 3.0 | 9.1 | - | 3.65 | 5.68 |
| Germany | 4 | 4.1 | 8.0 | 32.9 | 3.03 | 4.98 |
| Greece | 1 | 2.4 | 16.3 | - | 1.27* | 4.09 |
| Hungary | 1 | 3.1 | 3.4 | 8.4 | 3.57 | 4.71 |
| Iceland | 1 | - | - | - | 3.63 | 7.36 |
| Ireland | 2 | 5.2 | 5.2 | 5.1 | 3.40 | 6.15 |
| Italy | 4 | 2.1 | 20.0 | - | 1.97 | 4.29 |
| Latvia | 1 | 5.3 | 11.2 | - | 1.48* | 4.96 |
| Lithuania | 0 | 0.9 | 14.0 | 21.0 | 2.13* | 5.17 |
| Luxembourg | 0 | 1.9 | 21.4 | 65.3 | 3.61 | 3.15 |
| Malta | 0 | 3.0 | 3.0 | - | 1.24* | 7.96 |
| Netherlands | 5 | 3.2 | 10.7 | - | 1.81 | 5.93 |
| Norway | 5 | - | - | - | 3.13 | 6.66 |
| Poland | 0 | 2.5 | 3.5 | - | 1.61 | 4.94 |
| Portugal | 1 | 1.8 | 5.4 | 4.7 | 1.43 | 5.27 |
| Romania | 0 | - | 3.1 | - | 1.63* | 3.07 |
| Slovakia | 0 | 3.6 | 3.6 | 2.7 | 2.06 | 4.06 |
| Slovenia | 0 | 9.7 | 6.0 | 15.4 | 1.96 | 5.68 |
| Spain | 4 | 2.4 | - | - | 1.46 | 4.82 |
| Sweden | 2 | 1.0 | 23.4 | 104.2 | 3.64 | 6.82 |
| Switzerland | 2 | - | - | - | 2.03 | 5.28 |
| UK | 6 | 7.0 | 4.5 | - | 3.95 | 5.98 |

*Note.* Values with an asterisk were derived from the World Social Protection Report.

Supplementary Table 2

*Results of linear multilevel regression analyses of fighting separately*

| Fixed effects | |  | | Model 1 AIC = 465348 | | Model 2 AIC = 420961 | | Model 3 AIC = 420953 | | Model 3 sub AIC = 373715 | | Model 4 AIC = 391276 | | Model 4 sub AIC = 367636 | |
| --- | --- | --- | --- | --- | --- | --- | --- | --- | --- | --- | --- | --- | --- | --- | --- |
|  |  |  | | B | S.E. | B | S.E. | B | S.E. | B | S.E. | B | S.E. | B | S.E. |
| Constant |  |  | | 0.007 | 0.019 | -0.357** | 0.019 | -0.356** | 0.017 | -0.342** | 0.015 | -0.016 | 0.158 | -0.018 | 0.129 |
| Age |  |  | |  |  |  |  |  |  |  |  |  |  |  |  |
| 11 |  |  | |  |  | 0.181** | 0.006 | 0.181** | 0.006 | 0.173** | 0.006 | 0.177** | 0.006 | 0.174** | 0.006 |
| 13 |  |  | |  |  | 0.119** | 0.006 | 0.119** | 0.006 | 0.115** | 0.006 | 0.112** | 0.006 | 0.114** | 0.006 |
| 15 (ref) |  |  | |  |  | Ref. | Ref. | Ref. | Ref. | Ref. | Ref. | Ref. | Ref. | Ref. | Ref. |
| Gender |  |  | |  |  |  |  |  |  |  |  |  |  |  |  |
| Boy |  |  | |  |  | 0.523** | 0.005 | 0.523** | 0.005 | 0.530** | 0.005 | 0.529** | 0.005 | 0.531** | 0.005 |
| Girl (ref) |  |  | |  |  | Ref. | Ref. | Ref. | Ref. | Ref. | Ref. | Ref. | Ref. | Ref. | Ref. |
| SES |  |  | |  |  | 0.003 | 0.008 | 0.003 | 0.008 | 0.003 | 0.009 | 0.006 | 0.009 | 0.003 | 0.009 |
| Policy |  |  | |  |  |  |  | -0.074* | 0.022 |  |  | -0.072* | 0.024 |  |  |
| Monitoring | | | |  |  |  |  |  |  | -0.028 | 0.015 |  |  | -0.022 | 0.014 |
| Facilities |  | |  |  |  |  |  |  |  | -0.059* | 0.015 |  |  | -0.057** | 0.013 |
| GDP family benefits | | |  |  |  |  |  |  |  | 0.031 | 0.016 |  |  | 0.040 | 0.016 |
| GDP education | | |  |  |  |  |  |  |  | -0.015 | 0.015 |  |  | -0.031 | 0.017 |
| Adult violence | | |  |  |  |  |  |  |  |  |  | -0.000 | 0.014 | 0.003 | 0.012 |
| Adult well-being | | |  |  |  |  |  |  |  |  |  | -0.002 | 0.002 | -0.003 | 0.002 |
| Income inequality | | | |  |  |  |  |  |  |  |  | -0.010 | 0.004 | -0.009 | 0.004 |
| Variance components | | | |  |  |  |  |  |  |  |  |  |  |  |  |
| Level 1 (child) variance | | | | 0.989** | 0.003 | 0.895** | 0.003 | 0.895** | 0.003 | 0.918** | 0.004 | 0.905** | 0.003 | 0.916** | 0.004 |
| Level 2 (country) variance | | | | 0.011** | 0.003 | 0.010** | 0.003 | 0.007** | 0.002 | 0.005** | 0.001 | 0.006** | 0.002 | 0.003** | 0.001 |

*Note. N individual* = 172829; *N countries* = 30; * *p* < .01; ** *p* < .001

Supplementary Table 3

*Results of linear multilevel regression analyses of bullying separately*

| Fixed effects | |  | | Model 1 AIC = 461611 | | Model 2 AIC = 420063 | | Model 3 AIC = 420056 | | Model 3 sub AIC = 375808 | | Model 4 AIC = 395786 | | Model 4 sub AIC = 371086 | |
| --- | --- | --- | --- | --- | --- | --- | --- | --- | --- | --- | --- | --- | --- | --- | --- |
|  |  |  | | B | S.E. | B | S.E. | B | S.E. | B | S.E. | B | S.E. | B | S.E. |
| Constant |  |  | | 0.024 | 0.048 | -0.084 | 0.049 | -0.082 | 0.042 | -0.077 | 0.043 | -0.707 | 0.336 | -0.631 | 0.337 |
| Age |  |  | |  |  |  |  |  |  |  |  |  |  |  |  |
| 11 |  |  | |  |  | -0.080** | 0.006 | -0.080** | 0.006 | -0.081** | 0.007 | -0.080** | 0.006 | -0.080** | 0.007 |
| 13 |  |  | |  |  | 0.016* | 0.006 | 0.016* | 0.006 | 0.027** | 0.006 | 0.021** | 0.006 | 0.027** | 0.006 |
| 15 (ref) |  |  | |  |  | Ref. | Ref. | Ref. | Ref. | Ref. | Ref. | Ref. | Ref. | Ref. | Ref. |
| Gender |  |  | |  |  |  |  |  |  |  |  |  |  |  |  |
| Boy |  |  | |  |  | 0.244** | 0.005 | 0.244** | 0.005 | 0.251** | 0.005 | 0.256** | 0.005 | 0.251** | 0.005 |
| Girl (ref) |  |  | |  |  | Ref. | Ref. | Ref. | Ref. | Ref. | Ref. | Ref. | Ref. | Ref. | Ref. |
| SES |  |  | |  |  | 0.006 | 0.008 | 0.006 | 0.008 | 0.000 | 0.009 | 0.009 | 0.009 | 0.001 | 0.009 |
| Policy |  |  | |  |  |  |  | -0.194* | 0.059 |  |  | -0.213** | 0.052 |  |  |
| Monitoring | | | |  |  |  |  |  |  | -0.108 | 0.048 |  |  | -0.071 | 0.036 |
| Facilities |  | |  |  |  |  |  |  |  | 0.015 | 0.048 |  |  | -0.011 | 0.034 |
| GDP family benefits | | |  |  |  |  |  |  |  | -0.013 | 0.051 |  |  | -0.045 | 0.043 |
| GDP education | | |  |  |  |  |  |  |  | -0.088 | 0.046 |  |  | -0.111 | 0.043 |
| Adult violence | | |  |  |  |  |  |  |  |  |  | 0.150** | 0.031 | 0.154** | 0.032 |
| Adult well-being | | |  |  |  |  |  |  |  |  |  | 0.012 | 0.005 | 0.015 | 0.006 |
| Income inequality | | | |  |  |  |  |  |  |  |  | 0.005 | 0.009 | 0.001 | 0.010 |
| Variance components | | | |  |  |  |  |  |  |  |  |  |  |  |  |
| Level 1 (child) variance | | | | 0.929** | 0.003 | 0.898** | 0.003 | 0.898** | 0.003 | 0.0942** | 0.004 | 0.942** | 0.004 | 0.949** | 0.004 |
| Level 2 (country) variance | | | | 0.070** | 0.018 | 0.070** | 0.018 | 0.052** | 0.013 | 0.047** | 0.013 | 0.026** | 0.007 | 0.024** | 0.007 |

*Note. N individual* = 172829; *N countries* = 30; * *p* < .01; ** *p* < .001
